# Supplementary material for: Evaluation of Sn(ii) aminoalkoxide precursors for atomic layer deposition of SnO thin films
Source: Royal Society of Chemistry journal article supplement (doi:10.1039/d1dt02480a), 2021-01-01
Supplement: d1dt02480a1.pdf [file d1dt02480a1.pdf]

## Evaluation of Sn(II) Aminoalkoxide Precursors for Atomic Layer Deposition of SnO Thin Films.

James D. Parish,<sup>a</sup> Michael W. Snook,<sup>a</sup> and Andrew L. Johnson,<sup>a</sup>

<sup>a</sup> Department of Chemistry, University of Bath. Claverton Down, Bath, BA2 7AY, UK.  
E-mail: [A.L.Johnson@bath.ac.uk](mailto:A.L.Johnson@bath.ac.uk)

### Contents

|                                                                                                                                                                                                                                                                                                                                                                                                                             |    |
|-----------------------------------------------------------------------------------------------------------------------------------------------------------------------------------------------------------------------------------------------------------------------------------------------------------------------------------------------------------------------------------------------------------------------------|----|
| <b>Table 1S:</b> Crystal and structure refinement data for <b>1a-d</b> and <b>2a-d</b> .                                                                                                                                                                                                                                                                                                                                    | 2  |
| <b>Table 2S:</b> Crystal and structure refinement data for <b>3a-d</b> .                                                                                                                                                                                                                                                                                                                                                    | 3  |
| Additional Crystallographic Details                                                                                                                                                                                                                                                                                                                                                                                         | 4  |
| <b>Figure S1:</b> Molecular structure of $[(\text{Me}_2\text{NCH}_2\text{C}(\text{H})\text{MeO})\text{Sn}(\mu\text{-NMe}_2)]_2$ ( <b>1b</b> ). Thermal ellipsoids are shown at 50% probability. Symmetry transformations used to generate equivalent atoms: 1-X, 1-Y, 1-Z.                                                                                                                                                  | 5  |
| <b>Figure S2:</b> Molecular structure of $[\{(\text{Me}_3\text{Si})_2\text{N}\}\text{Sn}(\mu\text{-OCH}_2\text{CH}_2\text{Me}_2)]_2$ ( <b>2a</b> ). Thermal ellipsoids are shown at 50% probability.                                                                                                                                                                                                                        | 6  |
| <b>Figure S3:</b> Molecular structure of $[\{(\text{Me}_3\text{Si})_2\text{N}\}\text{Sn}(\mu\text{-OC}(\text{H})\text{MeCH}_2\text{Me}_2)]_2$ ( <b>2b</b> ). Thermal ellipsoids are shown at 50% probability. Hydrogen atoms have been omitted for clarity. Disorder in the ligand backbone [N(3), C(21)-C(25) and N(3A), C(21A)-C(25A)] and the HMDS ligand [C(15)-C(17) and C(15A)-C(17A)] have been omitted for clarity. | 7  |
| <b>Figure S4:</b> Molecular structure of $[\text{Sn}(\text{OCH}_2\text{CH}_2\text{Me}_2)_2]$ ( <b>3a</b> ). Thermal ellipsoids are shown at 50% probability. Symmetry transformations used to generate equivalent atoms: 1-X, 1-Y, Z.                                                                                                                                                                                       | 8  |
| <b>Table 3S</b> – Evaporation rates of of $[\text{Sn}\{\text{dmae}\}_2]$ ( <b>3a</b> ), $[\text{Sn}\{\text{dmap}\}_2]$ ( <b>3b</b> ), $[\text{Sn}\{\text{dmamp}\}_2]$ ( <b>3c</b> ) and $[\text{Sn}\{\text{Fdmamp}\}_2]$ ( <b>3d</b> ) at 70°C.                                                                                                                                                                             | 9  |
| .....                                                                                                                                                                                                                                                                                                                                                                                                                       | 9  |
| <b>References</b>                                                                                                                                                                                                                                                                                                                                                                                                           | 10 |

## Supplementary Information

Table 1S: Crystal and structure refinement data for 1a-d and 2a-d.

| Compound reference                                                                     | <b>1a</b>                                                                     | <b>1b</b>                                                                     | <b>1c</b>                                                                     | <b>1d</b>                                                                                     | <b>2a</b>                                                                                     | <b>2b</b>                                                                                     | <b>2c</b>                                                                                     | <b>2d</b>                                                                         |
|----------------------------------------------------------------------------------------|-------------------------------------------------------------------------------|-------------------------------------------------------------------------------|-------------------------------------------------------------------------------|-----------------------------------------------------------------------------------------------|-----------------------------------------------------------------------------------------------|-----------------------------------------------------------------------------------------------|-----------------------------------------------------------------------------------------------|-----------------------------------------------------------------------------------|
| Chemical formula                                                                       | C <sub>12</sub> H <sub>32</sub> N <sub>4</sub> O <sub>2</sub> Sn <sub>2</sub> | C <sub>14</sub> H <sub>36</sub> N <sub>4</sub> O <sub>2</sub> Sn <sub>2</sub> | C <sub>16</sub> H <sub>40</sub> N <sub>4</sub> O <sub>2</sub> Sn <sub>2</sub> | C <sub>16</sub> H <sub>28</sub> F <sub>12</sub> N <sub>4</sub> O <sub>2</sub> Sn <sub>2</sub> | C <sub>20</sub> H <sub>56</sub> N <sub>4</sub> O <sub>2</sub> Si <sub>4</sub> Sn <sub>2</sub> | C <sub>22</sub> H <sub>60</sub> N <sub>4</sub> O <sub>2</sub> Si <sub>4</sub> Sn <sub>2</sub> | C <sub>24</sub> H <sub>64</sub> N <sub>4</sub> O <sub>2</sub> Si <sub>4</sub> Sn <sub>2</sub> | C <sub>12</sub> H <sub>26</sub> F <sub>6</sub> N <sub>2</sub> OSi <sub>2</sub> Sn |
| Formula Mass                                                                           | 501.79                                                                        | 529.85                                                                        | 557.90                                                                        | 773.80                                                                                        | 734.42                                                                                        | 762.48                                                                                        | 790.53                                                                                        | 503.22                                                                            |
| Crystal system                                                                         | Monoclinic                                                                    | Triclinic                                                                     | Monoclinic                                                                    | Monoclinic                                                                                    | Triclinic                                                                                     | Orthorhombic                                                                                  | Monoclinic                                                                                    | Triclinic                                                                         |
| <i>a</i> /Å                                                                            | 6.78330(10)                                                                   | 7.5712(4)                                                                     | 9.2945(3)                                                                     | 12.5872(3)                                                                                    | 8.7579(4)                                                                                     | 20.53720(10)                                                                                  | 8.6975(5)                                                                                     | 7.06130(10)                                                                       |
| <i>b</i> /Å                                                                            | 17.20280(10)                                                                  | 8.6744(5)                                                                     | 11.9266(4)                                                                    | 8.5519(2)                                                                                     | 8.9319(4)                                                                                     | 12.18560(10)                                                                                  | 14.292(3)                                                                                     | 8.48480(10)                                                                       |
| <i>c</i> /Å                                                                            | 8.14230(10)                                                                   | 9.2638(4)                                                                     | 10.7094(4)                                                                    | 12.5367(3)                                                                                    | 23.8923(19)                                                                                   | 14.37850(10)                                                                                  | 15.194(3)                                                                                     | 18.7724(2)                                                                        |
| $\alpha$ /°                                                                            | 90                                                                            | 73.154(5)                                                                     | 90                                                                            | 90                                                                                            | 80.516(5)                                                                                     | 90                                                                                            | 90                                                                                            | 94.6970(10)                                                                       |
| $\beta$ /°                                                                             | 95.9880(10)                                                                   | 74.104(5)                                                                     | 100.737(4)                                                                    | 100.094(3)                                                                                    | 86.651(5)                                                                                     | 90                                                                                            | 93.032(11)                                                                                    | 98.7470(10)                                                                       |
| $\gamma$ /°                                                                            | 90                                                                            | 68.138(5)                                                                     | 90                                                                            | 90                                                                                            | 68.460(4)                                                                                     | 90                                                                                            | 90                                                                                            | 110.7630(10)                                                                      |
| Unit cell volume/Å <sup>3</sup>                                                        | 944.955(19)                                                                   | 530.90(5)                                                                     | 1166.37(7)                                                                    | 1328.62(6)                                                                                    | 1714.68(18)                                                                                   | 3598.34(4)                                                                                    | 1886.0(5)                                                                                     | 1028.16(2)                                                                        |
| Temperature/K                                                                          | 150(2)                                                                        | 150(2)                                                                        | 150(2)                                                                        | 150(2)                                                                                        | 150(2)                                                                                        | 150(2)                                                                                        | 150(2)                                                                                        | 150(2)                                                                            |
| Space group                                                                            | <i>P</i> 2 <sub>1</sub> / <i>n</i>                                            | <b><i>P</i>Error!</b>                                                         | <i>P</i> 2 <sub>1</sub> / <i>n</i>                                            | <i>P</i> 2 <sub>1</sub> / <i>c</i>                                                            | <b><i>P</i>Error!</b>                                                                         | <i>Pca</i> 2 <sub>1</sub>                                                                     | <i>P</i> 2 <sub>1</sub> / <i>n</i>                                                            | <b><i>P</i>Error!</b>                                                             |
| No. of formula units per unit cell, <i>Z</i>                                           | 2                                                                             | 1                                                                             | 2                                                                             | 2                                                                                             | 2                                                                                             | 4                                                                                             | 2                                                                                             | 2                                                                                 |
| Radiation type                                                                         | Cu K $\alpha$                                                                 | Cu K $\alpha$                                                                 | Mo K $\alpha$                                                                 | Cu K $\alpha$                                                                                 | Mo K $\alpha$                                                                                 | Cu K $\alpha$                                                                                 | Mo K $\alpha$                                                                                 | Cu K $\alpha$                                                                     |
| Absorption coefficient, $\mu$ /mm <sup>-1</sup>                                        | 21.080                                                                        | 18.795                                                                        | 2.156                                                                         | 15.946                                                                                        | 1.618                                                                                         | 12.523                                                                                        | 1.476                                                                                         | 11.530                                                                            |
| No. of reflections measured                                                            | 18198                                                                         | 3776                                                                          | 7109                                                                          | 9233                                                                                          | 7177                                                                                          | 35425                                                                                         | 21534                                                                                         | 34240                                                                             |
| No. of independent reflections                                                         | 1884                                                                          | 2104                                                                          | 2261                                                                          | 2647                                                                                          | 7177                                                                                          | 6731                                                                                          | 4216                                                                                          | 4091                                                                              |
| <i>R</i> <sub>int</sub>                                                                | 0.0404                                                                        | 0.0224                                                                        | 0.0542                                                                        | -                                                                                             | -                                                                                             | 0.0390                                                                                        | 0.0347                                                                                        | 0.0419                                                                            |
| Final <i>R</i> <sub><i>I</i></sub> values ( <i>I</i> > 2 $\sigma$ ( <i>I</i> ))        | 0.0173                                                                        | 0.0297                                                                        | 0.0339                                                                        | 0.0425                                                                                        | 0.0443                                                                                        | 0.0426                                                                                        | 0.0238                                                                                        | 0.0323                                                                            |
| Final <i>wR</i> ( <i>F</i> <sup>2</sup> ) values ( <i>I</i> > 2 $\sigma$ ( <i>I</i> )) | 0.0431                                                                        | 0.0792                                                                        | 0.0538                                                                        | 0.1362                                                                                        | 0.1049                                                                                        | 0.1115                                                                                        | 0.0456                                                                                        | 0.0845                                                                            |
| Final <i>R</i> <sub><i>I</i></sub> values (all data)                                   | 0.0183                                                                        | 0.0304                                                                        | 0.0462                                                                        | 0.0567                                                                                        | 0.0461                                                                                        | 0.0430                                                                                        | 0.0288                                                                                        | 0.0323                                                                            |
| Final <i>wR</i> ( <i>F</i> <sup>2</sup> ) values (all data)                            | 0.0437                                                                        | 0.0799                                                                        | 0.0606                                                                        | 0.1385                                                                                        | 0.1072                                                                                        | 0.1119                                                                                        | 0.0473                                                                                        | 0.0845                                                                            |
| Goodness of fit on <i>F</i> <sup>2</sup>                                               | 1.048                                                                         | 1.103                                                                         | 1.036                                                                         | 1.095                                                                                         | 1.085                                                                                         | 1.065                                                                                         | 1.067                                                                                         | 1.153                                                                             |
| Flack parameter                                                                        | -                                                                             | -                                                                             | -                                                                             | -                                                                                             | -                                                                                             | 0.34(12)                                                                                      | -                                                                                             | -                                                                                 |
| CSD Number                                                                             | 2055540                                                                       | 2055535                                                                       | 2055536                                                                       | 2055538                                                                                       | 2055542                                                                                       | 2055545                                                                                       | 2055534                                                                                       | 2055544                                                                           |

## Supplementary Information

Table 2S: Crystal and structure refinement data for **3a-d**.

| Compound reference                                                            | <b>3a</b>                                                       | <b>3b</b>                                                        | <b>3c</b>                                                        | <b>3d</b>                                                                        |
|-------------------------------------------------------------------------------|-----------------------------------------------------------------|------------------------------------------------------------------|------------------------------------------------------------------|----------------------------------------------------------------------------------|
| Chemical formula                                                              | C <sub>8</sub> H <sub>20</sub> N <sub>2</sub> O <sub>2</sub> Sn | C <sub>10</sub> H <sub>24</sub> N <sub>2</sub> O <sub>2</sub> Sn | C <sub>12</sub> H <sub>28</sub> N <sub>2</sub> O <sub>2</sub> Sn | C <sub>12</sub> H <sub>16</sub> F <sub>12</sub> N <sub>2</sub> O <sub>2</sub> Sn |
| Formula Mass                                                                  | 294.95                                                          | 323.00                                                           | 351.05                                                           | 566.96                                                                           |
| Crystal system                                                                | Orthorhombic                                                    | Monoclinic                                                       | Orthorhombic                                                     | Monoclinic                                                                       |
| <i>a</i> /Å                                                                   | 11.8081(2)                                                      | 11.7352(4)                                                       | 8.1592(3)                                                        | 18.5031(2)                                                                       |
| <i>b</i> /Å                                                                   | 10.1306(2)                                                      | 10.3182(3)                                                       | 13.8664(5)                                                       | 8.29960(10)                                                                      |
| <i>c</i> /Å                                                                   | 10.0735(2)                                                      | 12.0111(4)                                                       | 14.1626(5)                                                       | 12.5214(2)                                                                       |
| <i>α</i> /°                                                                   | 90                                                              | 90                                                               | 90                                                               | 90                                                                               |
| <i>β</i> /°                                                                   | 90                                                              | 95.166(3)                                                        | 90                                                               | 94.4840(10)                                                                      |
| <i>γ</i> /°                                                                   | 90                                                              | 90                                                               | 90                                                               | 90                                                                               |
| Unit cell volume/Å <sup>3</sup>                                               | 1205.02(4)                                                      | 1448.47(8)                                                       | 1602.34(10)                                                      | 1917.00(4)                                                                       |
| Temperature/K                                                                 | 150(2)                                                          | 150(2)                                                           | 150(2)                                                           | 150(2)                                                                           |
| Space group                                                                   | <i>Aba</i> <sub>2</sub>                                         | <i>C2/c</i>                                                      | <i>P2</i> <sub>1</sub> <i>2</i> <sub>1</sub>                     | <i>P2</i> <sub>1</sub> / <i>c</i>                                                |
| No. of formula units per unit cell, <i>Z</i>                                  | 4                                                               | 4                                                                | 4                                                                | 4                                                                                |
| Radiation type                                                                | Mo Kα                                                           | Mo Kα                                                            | Mo Kα                                                            | Cu Kα                                                                            |
| Absorption coefficient, μ/mm <sup>-1</sup>                                    | 2.097                                                           | 1.752                                                            | 1.590                                                            | 11.814                                                                           |
| No. of reflections measured                                                   | 32894                                                           | 6274                                                             | 13388                                                            | 13270                                                                            |
| No. of independent reflections                                                | 1410                                                            | 1660                                                             | 3800                                                             | 3815                                                                             |
| <i>R</i> <sub>int</sub>                                                       | 0.0673                                                          | 0.0303                                                           | 0.0348                                                           | 0.0343                                                                           |
| Final <i>R</i> <sub><i>I</i></sub> values ( <i>I</i> > 2σ( <i>I</i> ))        | 0.0255                                                          | 0.0195                                                           | 0.0252                                                           | 0.0339                                                                           |
| Final <i>wR</i> ( <i>F</i> <sup>2</sup> ) values ( <i>I</i> > 2σ( <i>I</i> )) | 0.0509                                                          | 0.0418                                                           | 0.0422                                                           | 0.0894                                                                           |
| Final <i>R</i> <sub><i>I</i></sub> values (all data)                          | 0.0287                                                          | 0.0212                                                           | 0.0283                                                           | 0.0353                                                                           |
| Final <i>wR</i> ( <i>F</i> <sup>2</sup> ) values (all data)                   | 0.0521                                                          | 0.0424                                                           | 0.0430                                                           | 0.0909                                                                           |
| Goodness of fit on <i>F</i> <sup>2</sup>                                      | 1.211                                                           | 1.072                                                            | 1.051                                                            | 1.044                                                                            |
| Flack parameter                                                               | 0.47(8)                                                         | -                                                                | 0.16(3)                                                          | -                                                                                |
| CSD Number                                                                    | 2055537                                                         | 2055541                                                          | 2055543                                                          | 2055539                                                                          |

## Supplementary Information

### Additional Crystallographic Details

**1d:** The data pertaining to the structure of **1d** were integrated to take account of twinning. The twin fractions are in a 13:87 ratio and, while the final residuals are not as low as one might wish, the structural assignments is unambiguous. The diffraction maxima became very smeared at higher Bragg angles for this sample.

Supplementary Information

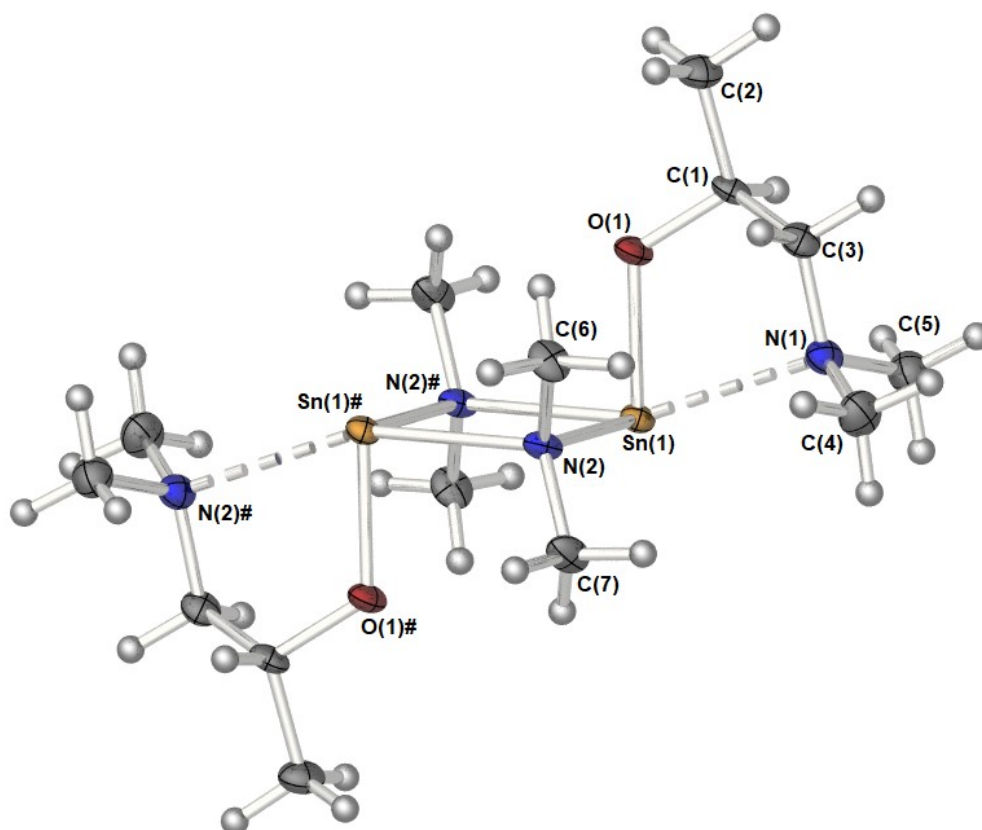

**Figure S1:** Molecular structure of  $[(\text{Me}_2\text{NCH}_2\text{C}(\text{H})\text{MeO})\text{Sn}(\mu\text{-NMe}_2)]_2$  (**1b**). Thermal ellipsoids are shown at 50% probability. Symmetry transformations used to generate equivalent atoms: 1-X, 1-Y, 1-Z.

Supplementary Information

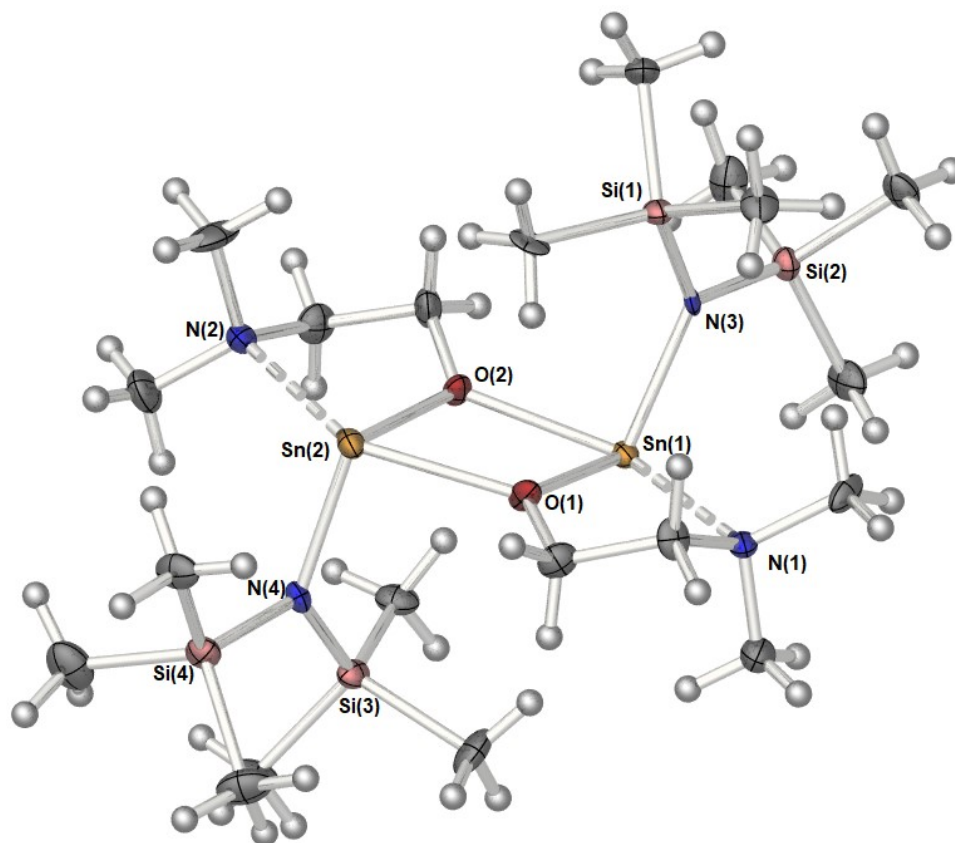

**Figure S2:** Molecular structure of  $[\{(Me_3Si)_2N\}Sn(\mu-OCH_2CH_2Me_2)]_2$  (**2a**). Thermal ellipsoids are shown at 50% probability.

Supplementary Information

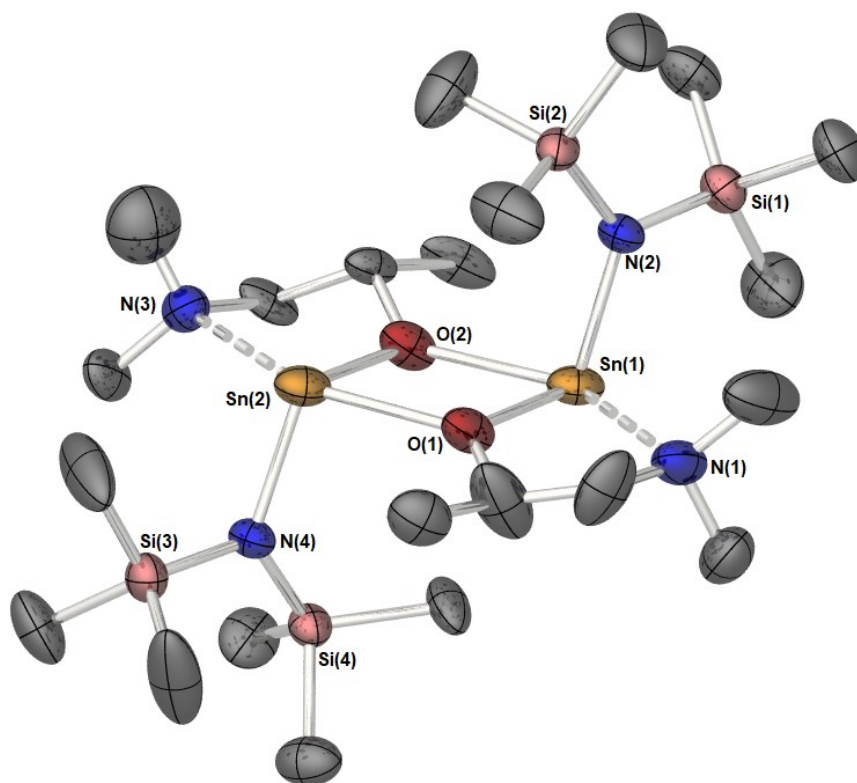

**Figure S3:** Molecular structure of  $[\{(\text{Me}_3\text{Si})_2\text{N}\}\text{Sn}(\mu\text{-OC}(\text{H})\text{MeCH}_2\text{Me}_2)]_2$  (**2b**). Thermal ellipsoids are shown at 50% probability. Hydrogen atoms have been omitted for clarity. Disorder in the ligand backbone [N(3), C(21)-C(25) and N(3A), C(21A)-C(25A)] and the HMDS ligand [C(15)-C(17) and C(15A)-C(17A)] have been omitted for clarity.

Supplementary Information

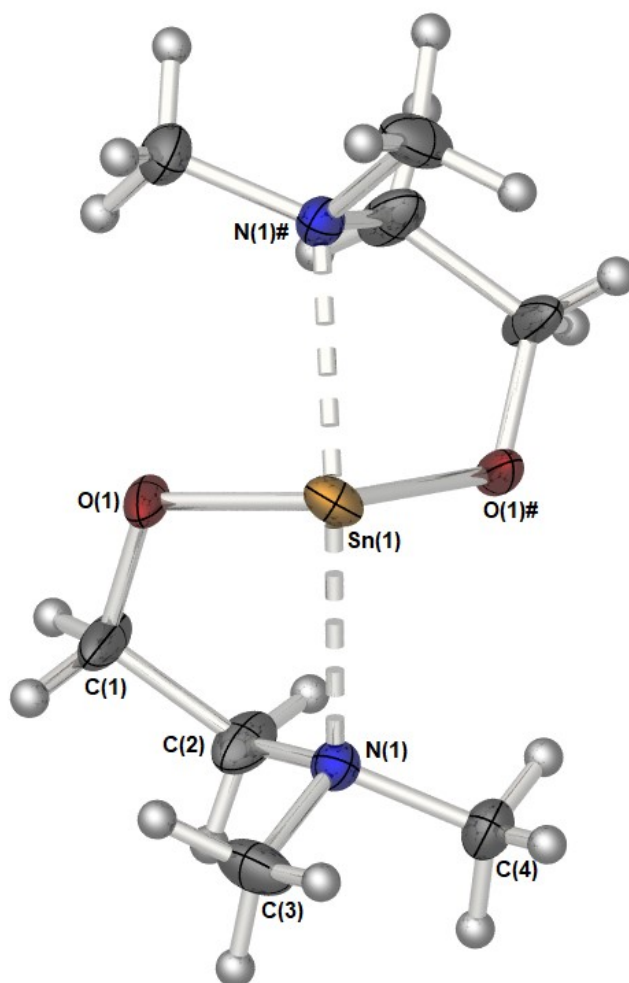

**Figure S4:** Molecular structure of [Sn(OCH<sub>2</sub>CH<sub>2</sub>Me)<sub>2</sub>] (**3a**). Thermal ellipsoids are shown at 50% probability. Symmetry transformations used to generate equivalent atoms: 1-X,1-Y, Z.



Supplementary Information

**Table 3S** – Evaporation rates of of [Sn{dmae}<sub>2</sub>] (**3a**), [Sn{dmap}<sub>2</sub>] (**3b**), [Sn{dmamp}<sub>2</sub>] (**3c**) and [Sn{Fdmamp}<sub>2</sub>] (**3d**) at 70°C.

| Compound  | Evaporation rate ( $\mu\text{g min}^{-1} \text{cm}^{-2}$ ) |
|-----------|------------------------------------------------------------|
| <b>3a</b> | 33.7                                                       |
| <b>3b</b> | 55.0                                                       |
| <b>3c</b> | 118.7                                                      |
| <b>3d</b> | 36.8                                                       |

## References

- [1] J. H. Han, Y. J. Chung, B. K. Park, S. K. Kim, H.-S. Kim, C. G. Kim, T.-M. Chung, *Chemistry of Materials* **2014**, *26*, 6088-6091.
